# Supplementary material for: Photo-driven selective CO2 reduction by H2O into ethanol over Pd/Mn–TiO2: suitable synergistic effect between Pd and Mn sites
Source: Royal Society of Chemistry journal article supplement (doi:10.1039/d0cy02047h), 2021-01-01
Supplement: d0cy02047h1.pdf [file d0cy02047h1.pdf]

**Support Information (SI):**

**Photo-driven selective CO<sub>2</sub> reduction by H<sub>2</sub>O into ethanol over Pd/Mn-TiO<sub>2</sub>: Suitable synergistic effect between Pd and Mn sites**

*Ting Peng<sup>a</sup>, Ke Wang<sup>a,b</sup>, Shihui He<sup>a,b</sup>, Xun Chen<sup>a,b</sup>, Wenxin Dai<sup>a,b\*</sup>,  
Xianzhi Fu<sup>a\*</sup>*

<sup>a</sup> Research Institute of Photocatalysis, State Key Laboratory of Photocatalysis on Energy and Environment, Fuzhou University, Fuzhou, 350002, China

<sup>b</sup> Key Laboratory of Eco-Materials Advanced Technology, Fuzhou University, Fujian, Fuzhou, 350002, China.

\*Corresponding author: Wenxin Dai Tel & Fax: +86-591-22865893

E-mail: [daiwenxin@fzu.edu.cn](mailto:daiwenxin@fzu.edu.cn) & [xzfu@fzu.edu.cn](mailto:xzfu@fzu.edu.cn)

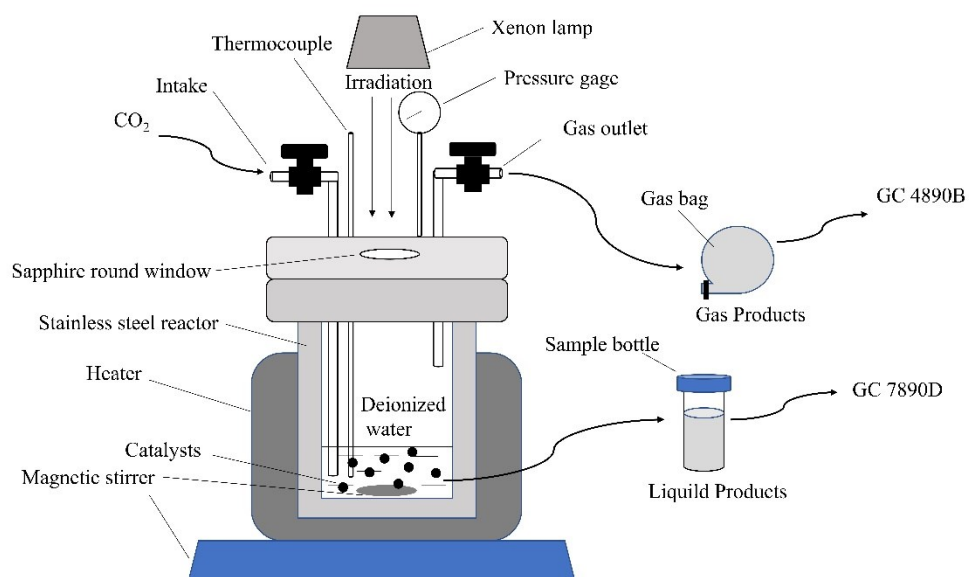

**Fig.S1.** Diagram of reactor

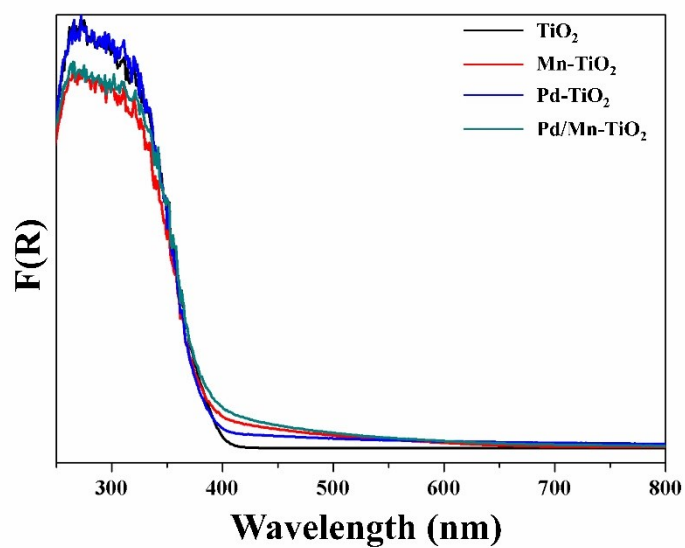

**Fig.S2.** UV-Vis DRS spectrums of TiO<sub>2</sub>, Mn-TiO<sub>2</sub>, Pd-TiO<sub>2</sub> and Pd/Mn-TiO<sub>2</sub> samples.

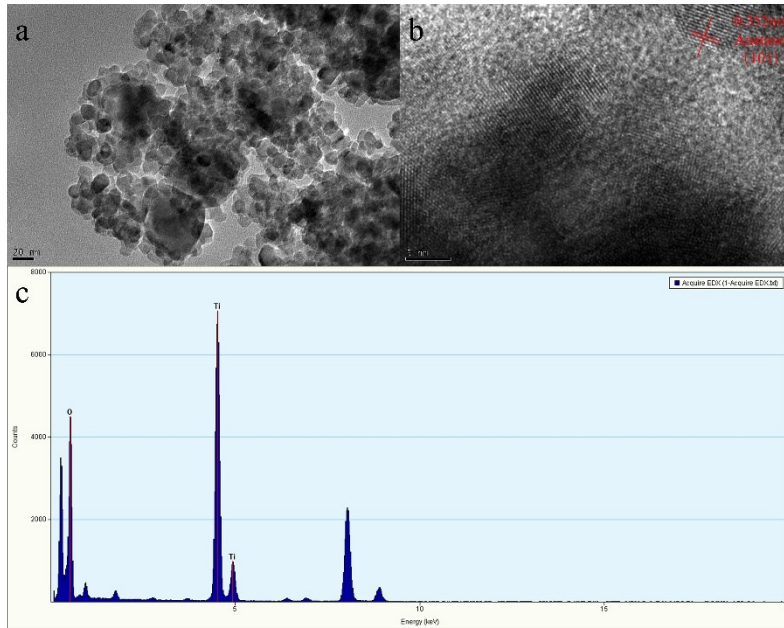

**Fig.S3.** The images of TEM (a), HRTEM (b) and EDX (c) of TiO<sub>2</sub> sample.

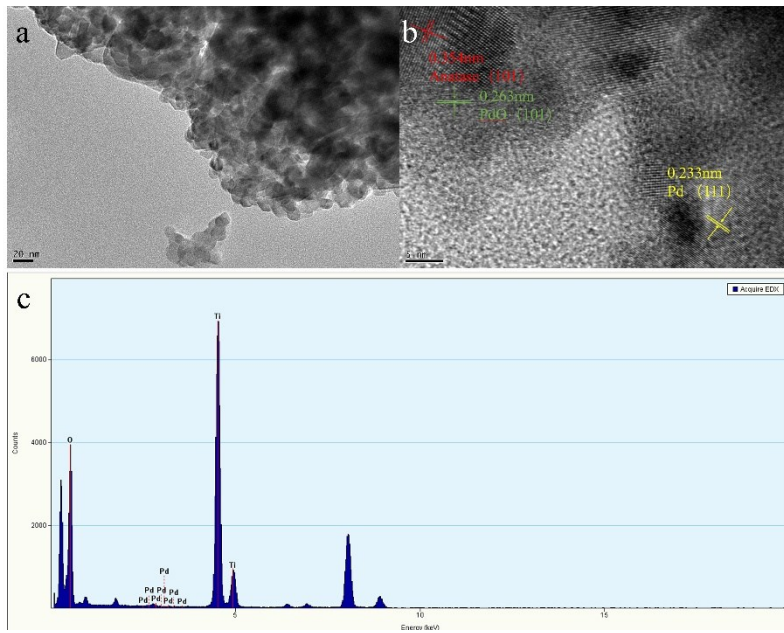

**Fig.S4.** The images of TEM (a), HRTEM (b) and EDX (c) of Pd-TiO<sub>2</sub> sample.

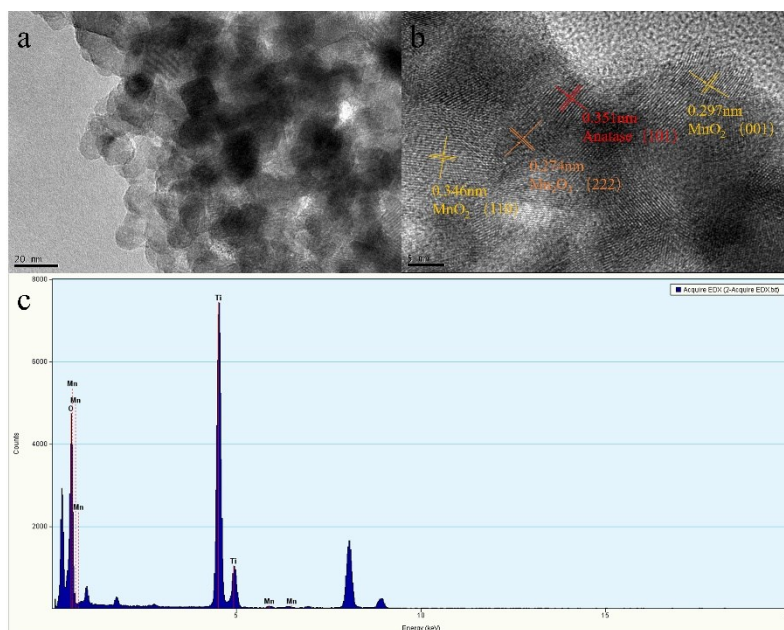

**Fig.S5.** The images of TEM (a), HRTEM (b) and EDX (c) of Mn-TiO<sub>2</sub> sample.

**Table S1** Element contents of TiO<sub>2</sub>, Mn-TiO<sub>2</sub>, Pd-TiO<sub>2</sub> and Pd/Mn-TiO<sub>2</sub>.

| Sample                 | Element | Content(mg/kg) |
|------------------------|---------|----------------|
| TiO <sub>2</sub>       | Ti      | 607237.7       |
| Pd-TiO <sub>2</sub>    |         | 603376.7       |
| Mn-TiO <sub>2</sub>    |         | 600777.0       |
| Pd/Mn-TiO <sub>2</sub> |         | 652224.1       |
| TiO <sub>2</sub>       | Pd      | 7.19           |
| Pd-TiO <sub>2</sub>    |         | 7762.2         |
| Mn-TiO <sub>2</sub>    |         | 7.32           |
| Pd/Mn-TiO <sub>2</sub> |         | 9459.8         |
| TiO <sub>2</sub>       | Mn      | 7.14           |
| Pd-TiO <sub>2</sub>    |         | 98.05          |
| Mn-TiO <sub>2</sub>    |         | 14894.6        |
| Pd/Mn-TiO <sub>2</sub> |         | 16717.0        |

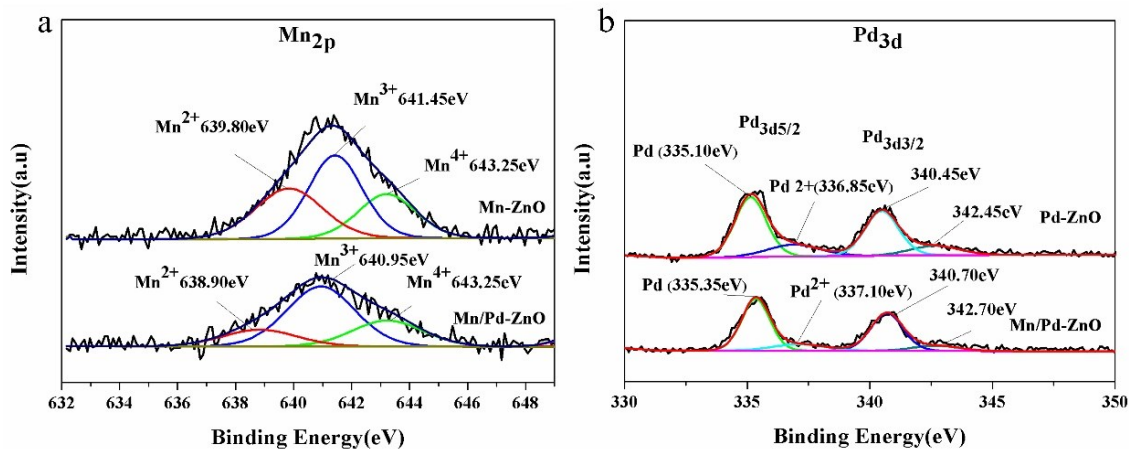

**Fig.S6.** High-resolution XPS spectra of Mn 2p of Mn-ZnO and Pd/Mn-ZnO samples (a); Pd 3d of Pd-ZnO and Pd/Mn-ZnO samples (b).

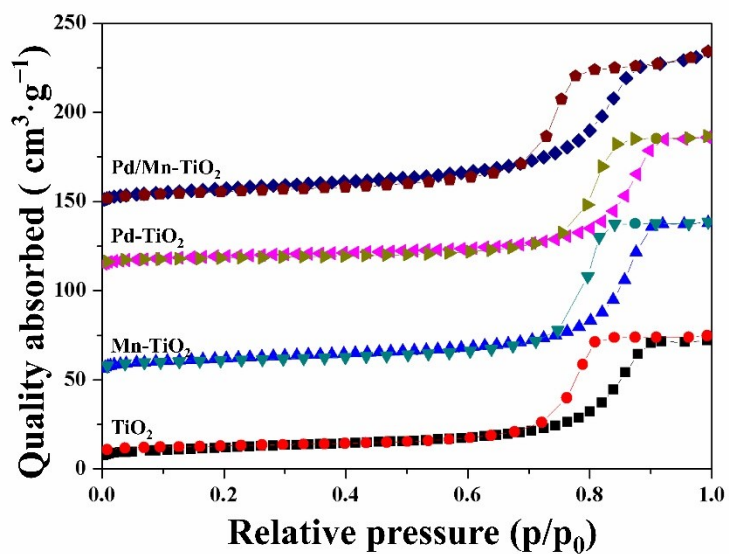

**Fig.S7.** N<sub>2</sub> adsorption–desorption isotherms of TiO<sub>2</sub>, Mn-TiO<sub>2</sub>, Pd-TiO<sub>2</sub> and Pd/Mn-TiO<sub>2</sub> samples.

**Table S2** The textural properties of TiO<sub>2</sub>, Mn-TiO<sub>2</sub>, Pd-TiO<sub>2</sub> and Pd/Mn-TiO<sub>2</sub> samples.

|                        | Specific surface<br>area/(m <sup>2</sup> ·g <sup>-1</sup> ) | Pore<br>volume/(cm <sup>3</sup> ·g <sup>-1</sup> ) | Pore<br>diameter (nm) |
|------------------------|-------------------------------------------------------------|----------------------------------------------------|-----------------------|
| TiO <sub>2</sub>       | 41.770                                                      | 0.107                                              | 12.149                |
| Mn-TiO <sub>2</sub>    | 48.812                                                      | 0.135                                              | 13.244                |
| Pd-TiO <sub>2</sub>    | 40.493                                                      | 0.117                                              | 14.089                |
| Pd/Mn-TiO <sub>2</sub> | 58.453                                                      | 0.140                                              | 11.033                |

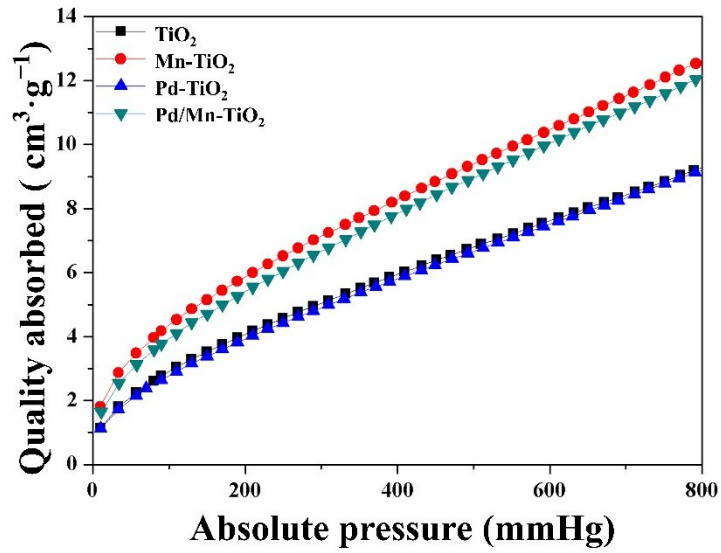

**Fig.S8.** CO<sub>2</sub> physical adsorption isotherms of TiO<sub>2</sub>, Mn-TiO<sub>2</sub>, Pd-TiO<sub>2</sub> and Pd/Mn-TiO<sub>2</sub> samples.

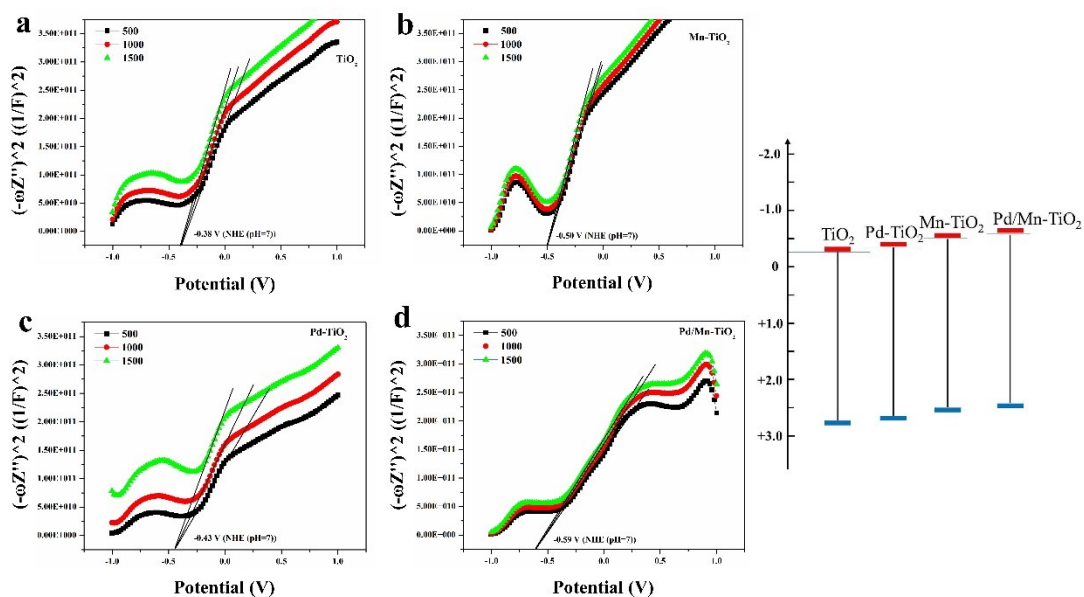

**Fig.S9.** The Mott-Schottky polt of (a)  $\text{TiO}_2$ , (b)  $\text{Pd-TiO}_2$ , (c)  $\text{Mn-TiO}_2$  and (d)  $\text{Pd/Mn-TiO}_2$  samples.

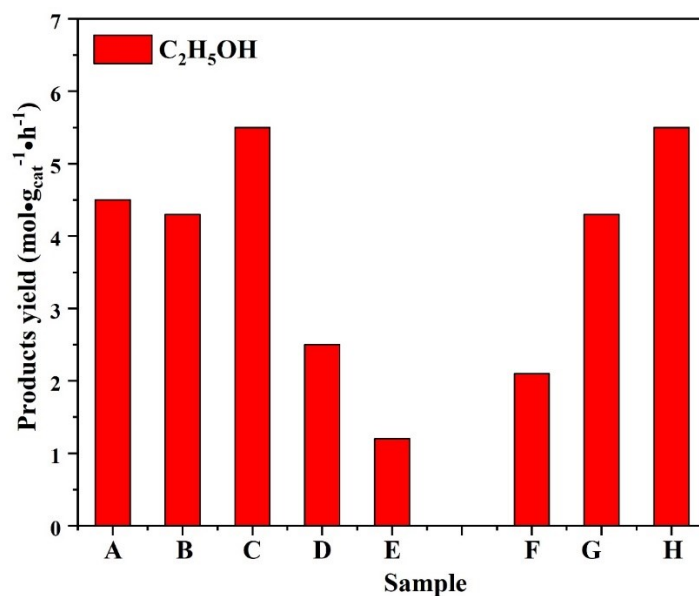

**Fig.S10.** Product yield of varied ratio of Pd/Mn doped  $\text{TiO}_2$  catalysts under UV irradiation, 3.5 MPa and 180 °C (A:0.9%Pd/0.9%Mn- $\text{TiO}_2$ , B:0.7%Pd/0.7%Mn- $\text{TiO}_2$ , C:0.5%Pd/0.5%Mn- $\text{TiO}_2$ , D:0.3%Pd/0.3%Mn- $\text{TiO}_2$ , E:0.1%Pd/0.1%Mn- $\text{TiO}_2$ , F:0.5%Pd/0.1%Mn- $\text{TiO}_2$ , G:0.1%Pd/0.5%Mn- $\text{TiO}_2$ , H:0.5%Pd/0.5%Mn- $\text{TiO}_2$ ).

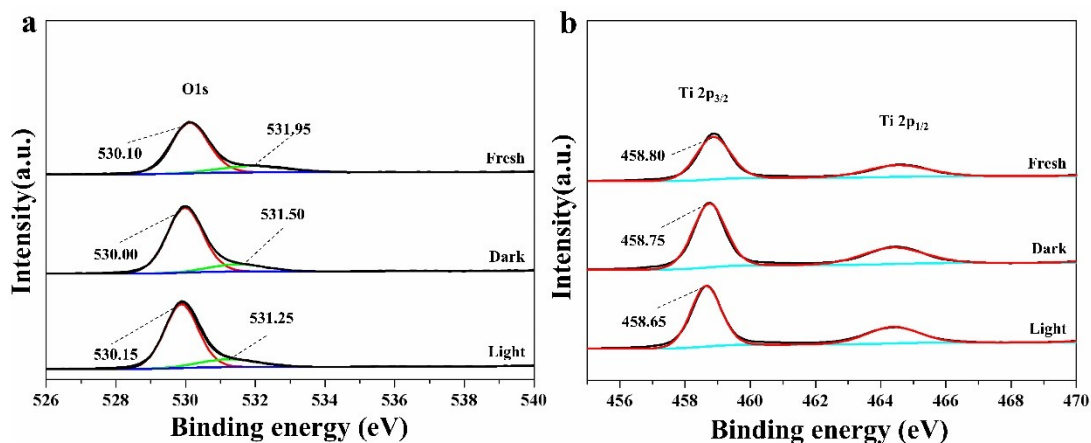

**Fig.S11.** High-resolution XPS spectra of O 1s (a) and Ti 2p (b) of  $\text{TiO}_2$  after various treatments: fresh, reaction in dark, reaction under irradiation.

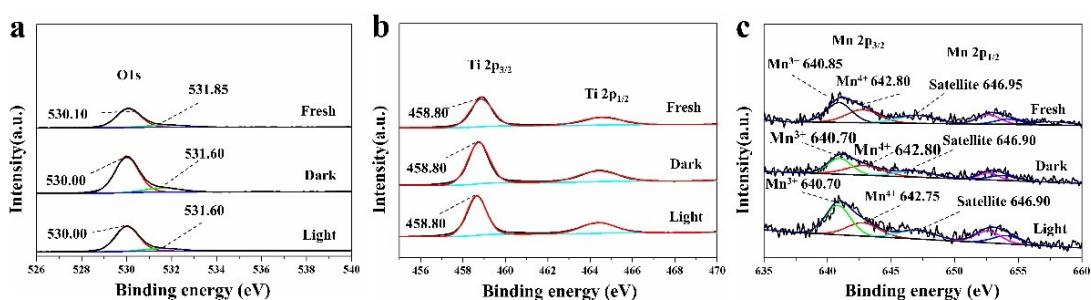

**Fig.S12.** High-resolution XPS spectra of O 1s (a), Ti 2p (b), and Mn 2p(c) of  $\text{Mn-TiO}_2$  after various treatments: fresh, reaction in dark, reaction under irradiation.

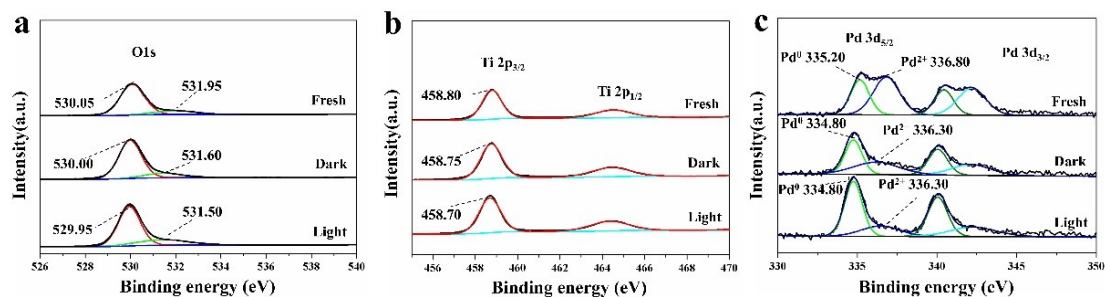

**Fig.S13.** High-resolution XPS spectra of O 1s (a), Ti 2p (b), and Pd 3d(c) of  $\text{Pd-TiO}_2$  after various treatments: fresh, reaction in dark, reaction under irradiation.



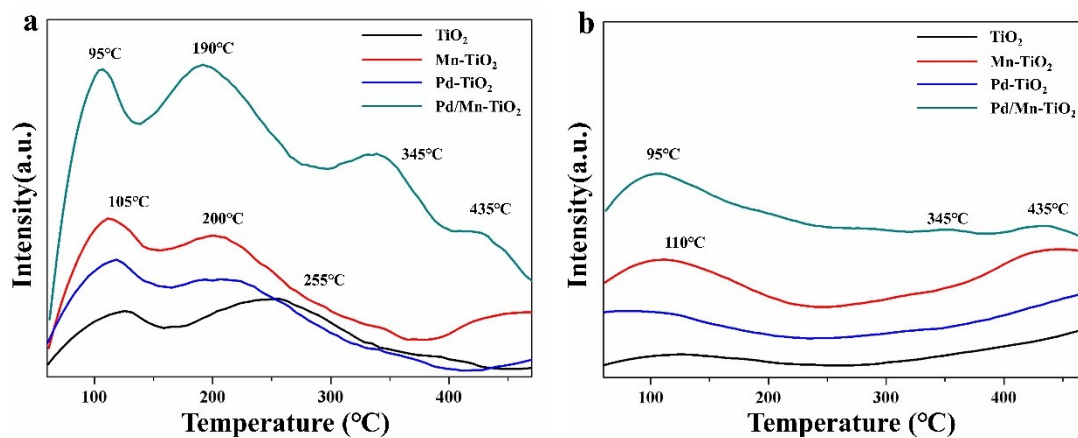

**Fig.S14.** TPD-MS spectra of CH<sub>4</sub> desorption (a), and CO desorption (b) on TiO<sub>2</sub>, Mn-TiO<sub>2</sub>, Pd-TiO<sub>2</sub> and Pd/Mn-TiO<sub>2</sub> samples.

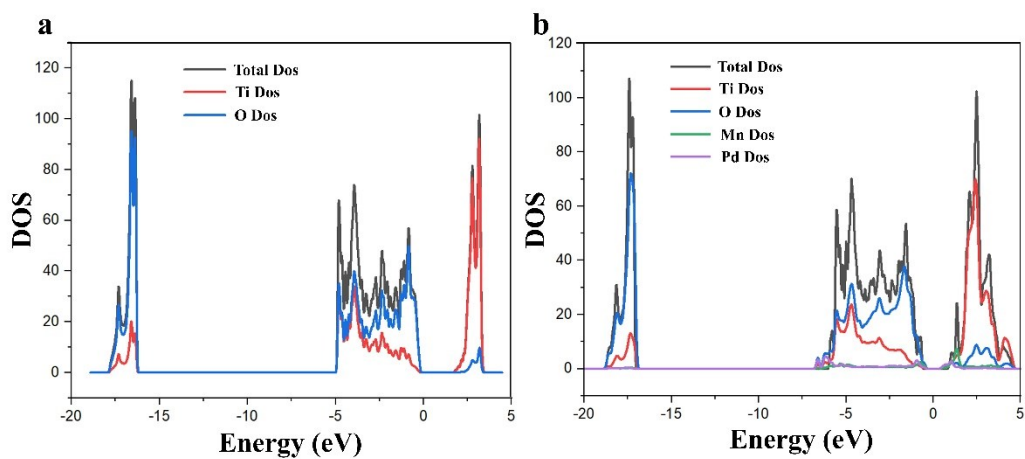

**Fig.S15.** Calculated density of states of TiO<sub>2</sub> and Mn/Pd-TiO<sub>2</sub>.

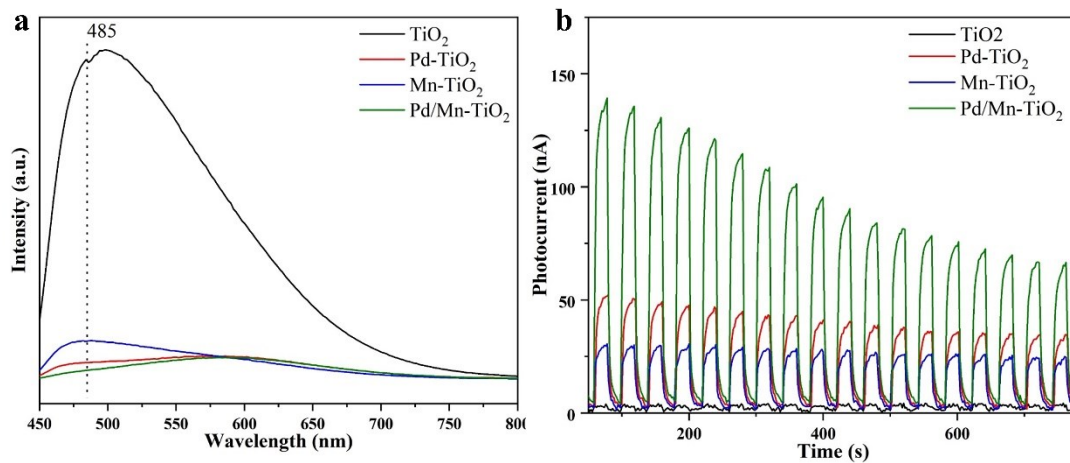

**Fig.S16.** PL spectra (a) and photocurrent experiments (b) results of TiO<sub>2</sub>, Mn-TiO<sub>2</sub>, Pd-TiO<sub>2</sub> and Pd/Mn-TiO<sub>2</sub> samples.

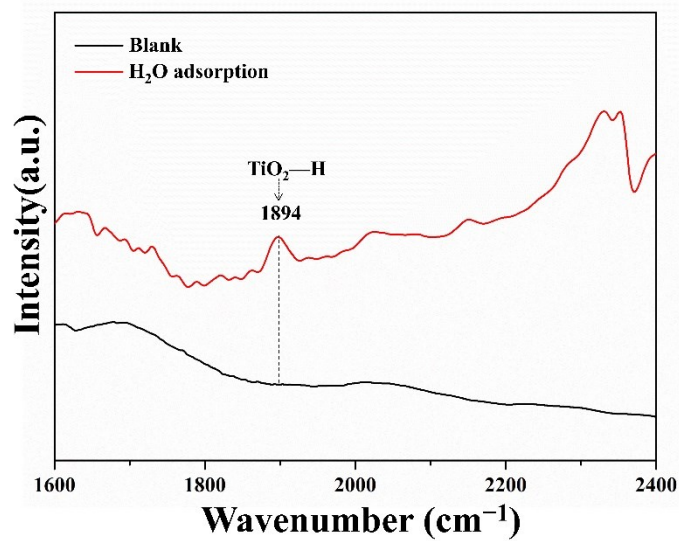

**Fig.S17.** In situ DRIFTS spectra of H<sub>2</sub>O adsorption on Pd/Mn-TiO<sub>2</sub> sample.

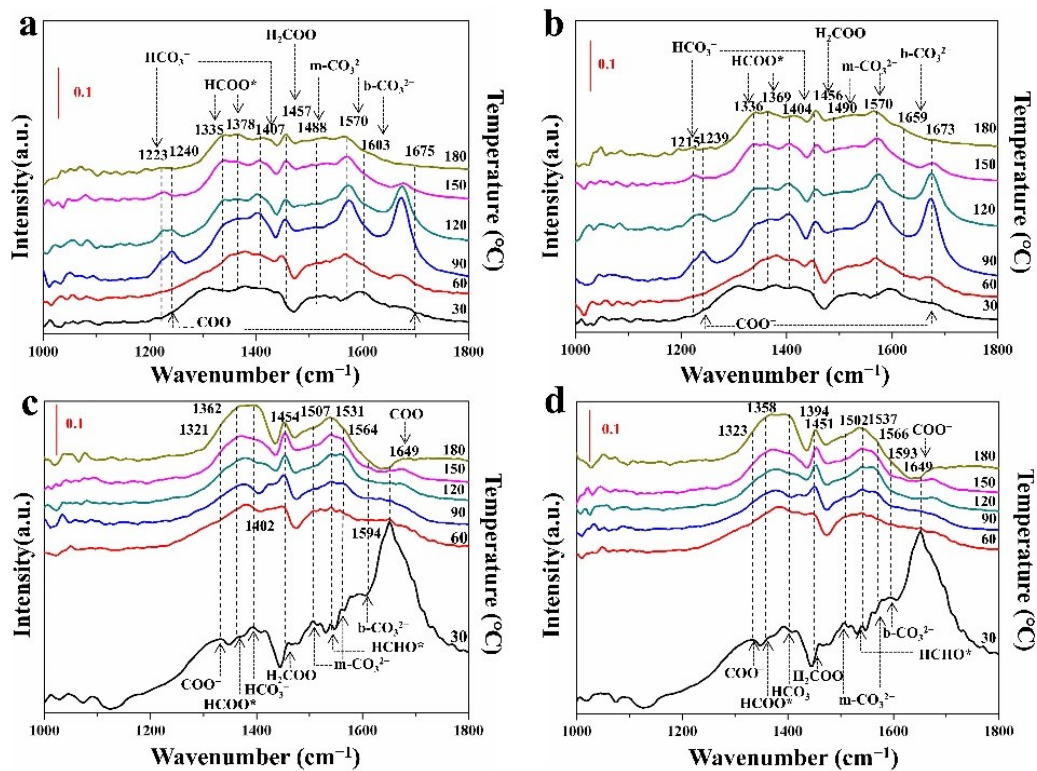

Fig.S18. In situ DRIFTS spectra of CO<sub>2</sub> adsorption at various condition: in dark (a) and under irradiation (b); CO<sub>2</sub>+H<sub>2</sub>O adsorption in dark (c) and under irradiation (d) on TiO<sub>2</sub> sample.

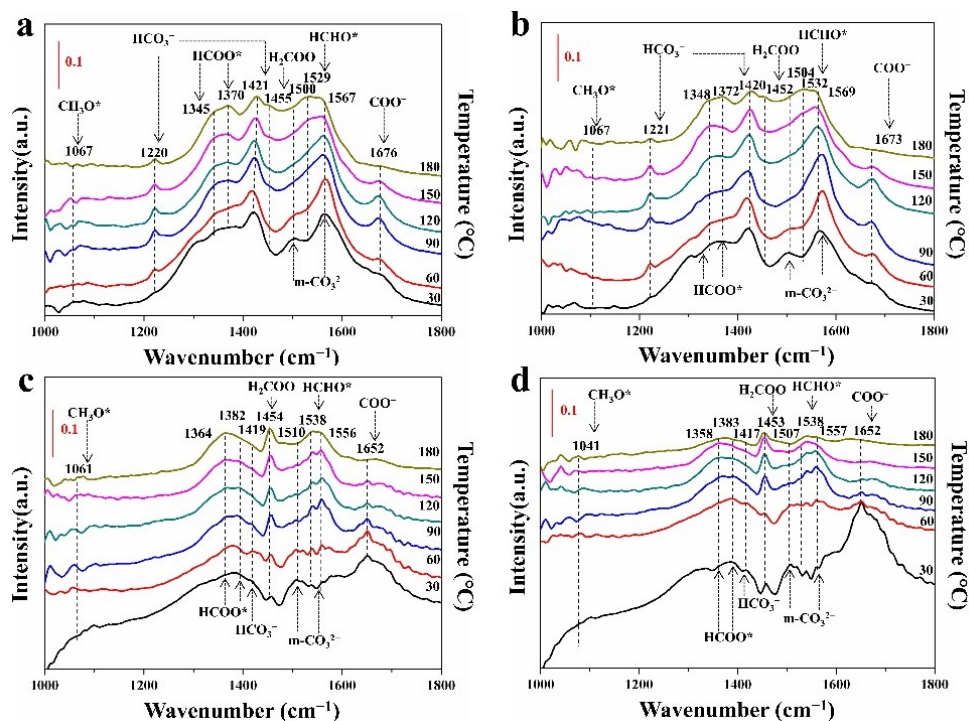

Fig.S19. In situ DRIFTS spectra of CO<sub>2</sub> adsorption at various condition: in dark (a) and under irradiation (b); CO<sub>2</sub>+H<sub>2</sub>O adsorption in dark (c) and under irradiation (d) on Mn-TiO<sub>2</sub> sample.

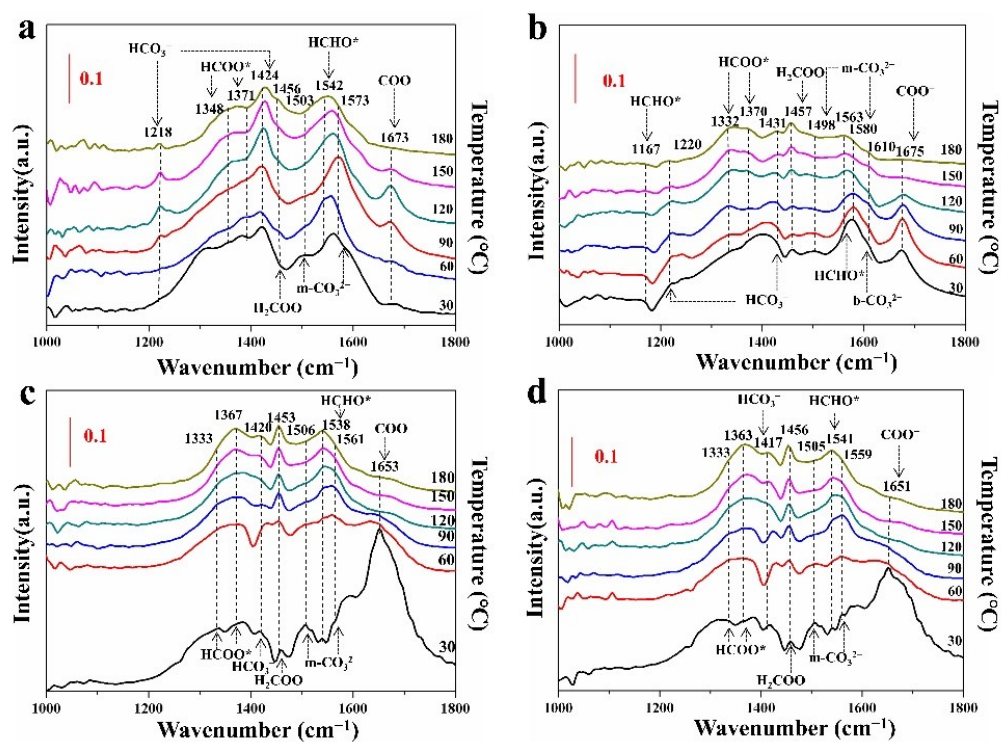

**Fig.S20.** In situ DRIFTS spectra of CO<sub>2</sub> adsorption at various condition: in dark (a) and under irradiation (b); CO<sub>2</sub>+H<sub>2</sub>O adsorption in dark (c) and under irradiation (d) on Pd-TiO<sub>2</sub> sample.
